# Supplementary material
Source: Elsevier journal article supplement (https://www.sciencedirect.com/science/article/pii/S1130634311002522)
Supplement: mmc2 [file S1130634311002522:mmc2.pdf]

| Anexo II. Medidas de mejora aplicadas en los hospitales como consecuencia del EMOPEM |                                                                                         |                              |
|--------------------------------------------------------------------------------------|-----------------------------------------------------------------------------------------|------------------------------|
| Etapa                                                                                |                                                                                         | Hospitales que las aplicaron |
| 2007-2008                                                                            | Ajuste de dosis en todos los casos insuficiencia renal por el farmacéutico en la PE     | 1, 6                         |
|                                                                                      | Acceso de los médicos a la historia de Atención Primaria                                | 11                           |
|                                                                                      | Control de dispensación de inhaladores y colirios                                       | 9                            |
|                                                                                      | Cambio presentaciones salbutamol solución para inhalación                               | 1                            |
|                                                                                      | Creación de Comisión de Seguridad                                                       | 6, 13, 26                    |
|                                                                                      | Eliminación de potasio cloruro concentrado del Formulario                               | 6, 13                        |
|                                                                                      | Envío puntual de los carros de dosis unitarias                                          | 17,21                        |
|                                                                                      | Guías de administración de fármacos unidas a la PE                                      | 14                           |
|                                                                                      | Información de la forma de administración de medicamentos a las enfermeras en el RAM.   | 7                            |
|                                                                                      | Información sobre seguridad y medicamentos en la intranet                               | 20                           |
|                                                                                      | Inicio de implantación de PE asistida                                                   | 1, 7, 11, 17                 |
|                                                                                      | Mejora colores de etiquetado y etiquetas auxiliares de fórmulas de Farmacia             | 1, 13, 19                    |
|                                                                                      | Mejora del etiquetado de medicamentos en las unidades asistenciales                     | 1, 18                        |
|                                                                                      | Normalización de horarios de administración de medicamentos                             | 6, 14, 17, 8                 |
|                                                                                      | Protocolo de intercambio terapéutico unido a la PE                                      | 1, 6, 14                     |
|                                                                                      | Protocolos farmacoterapéuticos incluidos en la PE                                       | 1, 6, 14                     |
|                                                                                      | Protocolos para medicamentos de alto riesgo y para la administración de medicamentos    | 1, 3, 11                     |
|                                                                                      | Recomendaciones para la prescripción                                                    | 1, 13                        |
|                                                                                      | Revisión reclamaciones medicamentos en horario farmacia cerrada                         | 14, 17                       |
|                                                                                      | Selección de presentaciones de medicamentos más seguras                                 | 1, 6, 13, 17, 19             |
| 2008-2009                                                                            | Señalizar medicamentos nevera, citostáticos y de alto riesgo en pantalla administración | 3                            |
|                                                                                      | Sesiones con enfermeras sobre los resultados obtenidos                                  | 1, 11, 14                    |
|                                                                                      | Sistema de notificación de errores de medicación, puesta en marcha                      | 20                           |
|                                                                                      | Utilizar carro de dosis unitarias para preparar la medicación                           | 4                            |
|                                                                                      | Curso sobre Seguridad y Medicamentos para médicos/farmacéuticos/enfermeras              | 9, 13, 17                    |
|                                                                                      | Eliminación de transcripción de la enfermera                                            | 6, 13                        |
|                                                                                      | Entrega de información manejo medicamentos iv, sonda, y relación con las comidas        | 6, 10, 13, 23                |
|                                                                                      | Firma de la enfermera después de la administración y no antes                           | 1, 6                         |
|                                                                                      | Implantación de la PE                                                                   | 6, 14                        |
|                                                                                      | Intervenciones del farmacéutico en la historia clínica                                  | 6, 14                        |
|                                                                                      | Modificación descripción medicamentos para diferenciarlos mejor y dosis más claras      | 10                           |
|                                                                                      | Normalización de horarios de administración de medicamentos                             | 23                           |
|                                                                                      | Protocolos farmacoterapéuticos incluidos en la PE                                       | 14                           |
|                                                                                      | Reenvasado de fracciones de formas farmacéuticas y adaptación de otras                  | 14                           |
|                                                                                      | Registro de errores de medicación en Urgencias                                          | 10                           |
|                                                                                      | Revisión del 100% de los cajetines de dosis unitarias en Farmacia                       | 12, 14                       |
|                                                                                      | Selección de presentaciones de medicamentos más seguras                                 | 6, 14                        |
|                                                                                      | Sesiones con enfermeras o/y médicos o/y farmacéuticos sobre los resultados obtenidos    | 1, 10, 14                    |
| 2009-2010                                                                            | Ajuste de dosis de heparinas BPM cuando el aclaramiento de creatinina es <30 ml/min     | 1                            |
|                                                                                      | Análisis de errores de medicación con médicos y enfermeras en sesiones generales        | 1, 24, 25                    |
|                                                                                      | Aviso a la hora de retirada de los parches de nitroglicerina en el plan de medicación   | 1, 6                         |
|                                                                                      | Conciliación de la medicación al ingreso y al alta                                      | 23                           |
|                                                                                      | Eliminación de potasio cloruro concentrado de las unidades de enfermería                | 1, 6, 14                     |
|                                                                                      | Extender la información al paciente antes de la administración por las enfermeras       | 26                           |
|                                                                                      | Formulario de Medicamentos en intranet con información detallada sobre medicamentos     | 6, 25                        |
|                                                                                      | Guía de preparación y administración de medicamentos por vía parenteral                 | 24                           |
|                                                                                      | Modificación de protocolos de anestesia                                                 | 10                           |
|                                                                                      | Normalización de horarios de administración de medicamentos                             | 24,26                        |
|                                                                                      | Nuevos equipos infusores para administración iv                                         | 6, 14                        |
|                                                                                      | Protocolos de fluidoterapia en la PE                                                    | 6, 14                        |
|                                                                                      | Protocolo de intercambio terapéutico unido a la PE                                      | 24                           |
|                                                                                      | Revisión de las prescripciones de anticoagulantes y aviso de incidencias a Hematología  | 1                            |
|                                                                                      | Sesiones de formación sobre administración de medicamentos a enfermeras                 | 26                           |
| 2010-2011                                                                            | Acceso del farmacéutico a la historia de Atención Primaria                              | 13, 24                       |
|                                                                                      | Dato del aclaramiento renal en cada pantalla de prescripción de un medicamento          | 1, 6                         |
|                                                                                      | Difusión información para manejo de salbutamol y salbutamol-ipratropio                  | 13                           |
|                                                                                      | Difusión en intranet del hospital de los resultados del EMOPEM                          | 10                           |
|                                                                                      | Eliminación de potasio cloruro concentrado de las unidades de enfermería                | 24                           |
|                                                                                      | Identificación de pacientes con etiquetas código de barras                              | 6, 25                        |
|                                                                                      | Implantación de la PE                                                                   | 6 y 13 (final), 25           |
|                                                                                      | Información pasiva en la PE sobre el ajuste de dosis en insuficiencia renal             | 1, 6, 14                     |
|                                                                                      | Información sobre ajuste de dosis en la PE en la insuficiencia renal                    | 1, 6                         |
|                                                                                      | Información sobre interacciones relevantes en la PE                                     | 14                           |
|                                                                                      | Preparación en Farmacia de dispositivos elastoméricos para PCA                          | 6, 14                        |
|                                                                                      | Registro electrónico de la administración de medicamentos con información               | 6, 14                        |
|                                                                                      | Restricción a un número razonable de las alertas a la PE                                | 10                           |
|                                                                                      | Revisión botiquines plantas                                                             | 13                           |
|                                                                                      | Sesiones con enfermeras sobre los resultados obtenidos                                  | 14, 24                       |
|                                                                                      | Sustitución directa de medicamentos de igual composición                                | 6,14                         |
| PE = Prescripción electrónica                                                        |                                                                                         |                              |
| PCA = Analgesia controlada por el paciente                                           |                                                                                         |                              |
| RAM = Registro de administración de medicamentos de la enfermera                     |                                                                                         |                              |
